# Supplementary material
Source: publisher figshare collection journal article supplement (https://gsajournals.figshare.com/ndownloader/files/24974876)
Supplement: Supplementary file 1 [file 24974876]

## Sheet: Sheet1
Table S5: Targeted GC_MS based metabolomic analysis comparing cell pellets, culture supernatants or cell-free media with either FBS or FEx supplementation
Cell pellets contained 45-50 million cells. 1 ml aliquots of culture supernatants or cell-free media was used for the analysis. The data was normalized to sample mass and an internal standard
Sample Names	Sample Group	D-Glucose	Glucose 6-phosphate	Pyruvic acid	L-Lactic acid	Citric acid	cis-Aconitic acid	Isocitric acid	Succinic acid	Fumaric acid	D-Ribose-5-phosphate	Glycine	L-Alanine	L-Valine	L-Leucine	L-Isoleucine	L-Proline	L-Phenylalanine	L-Tyrosine	L-Serine	L-Threonine	L-Methionine	L-Asparagine	L-Aspartic acid	L-Glutamic acid	L-Lysine	Pyroglutamic acid	Ornithine	Beta-Alanine	L-Threonine .1	D-Fructose	D-Galactose	Sorbitol	Ribitol	Myoinositol	Inositol phosphate	Sedoheptulose 7-phosphate	L-Sorbose	D-Threitol	Threonic acid	Nonanoic acid	Capric acid	Elaidic acid	Arachidic acid	Arachidonic Acid	Malonic acid	Unknown acid	Heptadecanoic acid	1-monomyristin
1	FBS_cell pellet1	4362775	3273687	6634466	746220	612115	10381	458834	836978	5671136	518100	803284	3892115	463554	3495202	246723	1934110	50979	8907421	3121316	980204	13789967	471300	954981	2442627	579099	1400922	380606	7287574	272076	222661	1444227	7039986	995691	10515183	11198715	734255	13646484	2889120	24451	4562285	254047	2222063	2746185	20762	70093	1909871	58555	168147
2	FBS_cell pellet2	3403356	2064513	5769092	619367	488189	6494	454016	611336	5033709	397973	579329	3071729	337297	3256958	179667	1561540	42231	6398410	2269966	701574	12503869	304778	639649	1803508	380824	886548	241781	6280200	211126	181168	1117452	4887272	791112	8427826	8821276	480600	11175711	2343280	18486	3681503	199171	3425142	1853979	12754	54802	1827657	66479	165710
3	FBS_cell pellet3	5057719	2630585	5907987	997209	518947	7250	521110	923431	6849749	406760	822584	5304541	438366	4800269	214385	3340976	70251	4361406	3499982	1077439	14271833	584718	677222	7022602	493111	1300417	520199	6083875	279424	260500	1407111	7408670	969771	9781147	9582319	537242	13783170	3007502	26004	1794261	236648	4108348	2579718	18818	55746	2758393	138383	115394
4	FBS_cell pellet4	4752713	1394633	4487245	773541	361219	5726	422515	612117	4542866	204169	760525	3817714	413369	3372984	199962	1384010	72375	2643667	2895863	878765	9319314	301336	485352	1681455	469377	595127	327075	4621854	277961	189912	805911	5714792	579185	6404833	2959112	277549	8417117	1737555	13439	1545523	123865	436613	879862	11239	28572	1707758	142483	65685
5	FBS_cell pellet5	16795051	3459869	8294514	1514761	747681	11738	505461	1621860	8500438	445942	1573401	7389537	812404	4961938	477020	2343304	82234	5388607	6332379	2054919	16437563	917788	754494	7139460	1233512	1308737	779082	7419772	569376	511077	1624484	13280353	1092803	13363175	12196611	605724	16062470	3553134	27570	2180123	231152	4484102	2659822	0	76066	2850581	113389	186055
6	FBS_cell pellet6	4370912	2286289	4801179	637299	391538	4770	421287	702344	4726474	327288	642353	3030328	345011	3153571	182270	941331	33014	4346344	2478386	814700	12445438	363932	601797	1661936	450533	870569	316283	6092288	238428	187023	1076757	5154489	769371	8166175	7688564	406963	10427429	2288935	19698	1700196	187794	4086840	1967309	14965	54865	2301243	67715	123079
19	FEx_cell pellet1	5716872	1938905	5226228	1844250	387773	3969	440782	800627	3069363	353561	828194	5051803	430428	3235102	234047	1223725	53828	7518820	3516164	1344187	11602794	319291	460734	980528	505458	780821	244554	7182927	329574	202129	432066	6886435	299363	11798800	6189856	410585	8627700	1483338	10573	1709832	162321	1521242	1922282	6003	45522	1711971	43641	94064
20	FEx_cell pellet2	5140719	2488440	8776272	1266986	564299	8699	601767	558003	4589361	440979	677564	4544611	321580	5012946	205397	916102	52399	9801017	2888183	1107320	16652404	424484	661040	1211429	420657	879409	725122	10153155	257147	149540	560376	5280242	373159	16011931	4747982	544281	12214849	1951581	9509	2213215	191955	3396452	2362808	0	46564	1999252	144676	101564
21	FEx_cell pellet3	9263546	3178336	8983258	1910551	572639	7830	672256	1019155	5665594	675130	1167474	7323773	599859	6836962	322125	2183904	62531	9483661	5080046	1914568	20275817	782265	861460	4212856	786594	1418168	655074	12730002	414343	259345	682062	8851692	457355	20218472	4872721	755030	14462452	2410282	14083	2263211	238508	6000146	3691201	14274	57159	2464231	102616	132736
22	FEx_cell pellet4	7526851	1962085	6343269	2122626	463496	8494	555996	793040	5128197	452766	772317	5090702	423152	4384941	254901	1254891	64751	6565854	3440243	1349425	15603325	514214	516401	1120947	522880	1223727	682933	10072867	316396	209225	524718	6450147	362195	16288553	3898788	537253	12059188	1978652	15416	2038362	179055	4794081	2259424	7541	46215	2030875	77889	93925
23	FEx_cell pellet5	9484346	1856743	4936546	1630530	371425	4595	336300	857941	3030328	428591	1003774	5790755	524747	2773348	288815	750985	69984	3930535	4529894	1695758	10817023	470097	418477	2093305	664509	884794	717494	7634350	375908	213389	379715	7780017	250552	12465292	4414415	379879	8188544	1364308	9633	1717374	134203	1127849	1641587	1752	43296	1459633	62141	81692
24	FEx_cell pellet6	6545814	2323830	5547754	1281838	447590	7324	471658	702468	3289472	550309	780549	4600094	448111	3822185	252615	1051919	39134	9663289	3446886	1374392	13372024	395604	598561	1734351	510305	796413	235445	8804041	308853	194399	494126	6131835	327447	13723254	4781761	410793	10219908	1652174	9969	1798975	170216	3632841	2189364	6396	56673	1577849	50061	123500
Sample Names	Sample Group	Glucose 6-phosphate	Pyruvic acid	Citric acid	cis-Aconitic acid	Isocitric acid	Succinic acid	Fumaric acid	Glycine	L-Alanine	L-Valine	L-Leucine	L-Isoleucine	L-Proline	L-Phenylalanine	L-Tyrosine	L-Serine	L-Threonine	L-Asparagine	L-Aspartic acid	L-Lysine	Pyroglutamic acid	Ornithine	beta-Alanine	L-Threonine .1	D-Fructose	D-Galactose	Sorbitol	Ribitol	Myoinositol	Inositol phosphate	Sedoheptulose 7-phosphate	D-Threitol	Threonic acid	Nonanoic acid	Capric acid	Myristic acid	Palmitoleic acid	Palmitic acid	Oleic acid	Elaidic acid	Arachidic acid	Arachidonic Acid	Malonic acid	Unknown acid	Heptadecanoic acid	1-Monomyristin	2-Monopalmitoylglycerol	2-Steroylglycerol
7	FBS_culture_supernatant1	2407018	581931	1103319	21564	313788	7227836	11123715	2195596	6686097	26662947	9539131	392617	3584432	117345	4529087	176699	4651742	28893	1623820	6358144	2481591	3099480	3145475	605971	1237932	2016289	1547242	2029936	1870255	101992	730219	10976534	233541	3079905	160910	10309851	2553634	10517082	6269572	4705229	461883	38016	27233	1215312	2847329	75911	1968527	296213
8	FBS_culture_supernatant2	2888129	470716	1142159	19983	301193	7726623	11992420	2097526	6726166	37635438	14874478	450217	6009439	137085	4707360	190214	4428000	29575	2347338	5521968	2930835	3234707	2999007	637478	1129722	2150058	1315417	1849731	1779187	269289	973278	11560728	256584	2171418	169936	7892497	12901126	14733286	16664411	2297672	1023095	40190	30367	1281355	3437379	64735	1518983	148563
9	FBS_culture_supernatant3	3125217	465671	1130712	24146	334992	8786982	13323732	1919323	6450640	34714263	14089674	447814	5492900	119410	4893938	207214	4018312	28704	2077713	5245221	3033467	3226120	2758063	605447	1089839	2295545	1259318	2037071	1600548	102908	990671	12516496	260172	1674820	148488	6909988	5996799	14098303	11167031	1347151	645256	43212	28054	1403956	3428789	44476	1630404	148915
10	FBS_culture_supernatant4	2539110	245328	1086861	27869	328822	7796400	12025099	1847348	5563228	34086218	13635983	300413	1708120	129863	6789542	130565	3721190	33464	2561490	4623501	2414399	3298822	2621733	513817	922990	2136145	1135343	1972733	1470978	109863	850208	10847353	256595	1439366	181146	11210701	2855467	18965876	5414865	650156	551479	25755	25945	1379891	180215	39441	1580695	0
11	FBS_culture_supernatant5	3300318	501149	1166632	22980	333531	8681748	13319832	1989973	6668023	35492254	14515947	492214	6036679	117372	5039893	208243	4172840	23065	2080063	5196698	3108008	3217341	2845628	621306	1131470	2370657	1304051	2070186	1656646	165596	1025244	12761213	262267	1574443	179811	12872219	9039127	15661365	15602519	1864042	823821	46461	34663	1765471	3604530	0	1506158	141116
12	FBS_culture_supernatant6	3121856	732848	1159907	23877	316198	7938786	12282857	2661878	8827153	33176724	12766839	607485	5828124	151677	5374102	234198	5714477	36285	1829268	7506053	2955377	3114729	3850627	803474	1589608	2253391	1785599	2064034	2307104	210672	952961	12326181	249725	1371503	200472	14414835	4614230	14347865	10810633	1313537	667248	48887	31857	1543853	3453279	27689	1475710	294857
25	FEx_culture_supernatant1	3036206	795211	659001	7814	325942	5050187	13828679	2611838	9775109	34473101	14741281	693905	3182804	151999	4287409	210803	5713212	28449	1446281	6620502	3202369	3405803	4149366	882464	101489	12492629	532840	331663	807568	154806	1031776	1342065	36051	1494197	103332	9211153	9094237	14036743	14500313	1771542	893784	55004	23670	8997220	4688469	56151	1249866	398156
26	FEx_culture_supernatant2	2090176	369486	467114	5549	283197	3928165	10375839	1682624	6484452	31437214	12745002	461373	1580751	104410	3122780	191513	3662656	23599	1525378	4276506	2361261	3099500	2766148	553699	74086	9739928	339615	267462	507504	70127	731852	1093215	36548	940124	59871	6400663	4922752	11413045	8971270	915937	517481	32403	18200	755832	2874769	33728	880140	73365
27	FEx_culture_supernatant3	3466430	735907	710005	7768	275444	5785945	16372143	2479084	10106978	43488769	17338319	586914	4390015	151005	4954522	225196	5473914	23524	1681387	6499797	3861119	3938558	3997007	829882	103201	15179660	495206	414737	767285	87161	1206539	1430950	59895	1750757	91901	9563641	5134644	12445011	9498753	1226715	635278	60265	26639	683515	5082960	61441	1586840	254863
28	FEx_culture_supernatant4	2882137	761475	562395	11044	215426	4484171	12612743	2112992	8464956	35935588	13202788	511680	3315772	134095	3547011	181045	4750872	18282	1291660	5629703	2927002	2654548	3514759	693817	89880	120306	444540	463473	691146	123274	892824	1217098	43502	1245911	75499	10846889	3912112	10589862	7720432	5850798	542116	48609	18309	668550	3854218	33495	1077007	394187
29	FEx_culture_supernatant5	3203835	564100	681914	6988	380161	5112147	14336420	2189324	8434510	41651353	17034628	507130	3532002	134993	4217638	168463	4710856	26200	2025416	5769328	3198974	3476778	3403042	739144	83579	13295001	403979	317392	643434	96168	1045988	1311653	48972	1738787	85773	6472355	9372308	15256430	15699179	1715856	681386	46209	23772	1126055	4093487	31249	1253408	98415
30	FEx_culture_supernatant6	3087737	468565	582054	5767	322569	4877721	14271372	2037932	7684662	45327856	16467741	518501	1571249	134725	4592398	176039	4449181	25877	1823478	5217976	3310461	3523864	3376126	650124	82901	13328936	414222	384744	614941	72634	1131627	1497614	44096	1499088	104237	8442257	5887498	15705490	10335991	1068134	662882	56956	24126	831662	4412006	35721	1412568	102971
Sample Names	Sample Group	Pyruvic acid	L-Lactic acid	Citric acid	cis-Aconitic acid	Isocitric acid	Succinic acid	Fumaric acid	D-Malic acid	D-ribose-5-phosphate	Glycine	L-Alanine	L-Valine	L-Leucine	L-Isoleucine	L-Proline	L-Phenylalanine	L-Tyrosine	L-Serine	L-Threonine	L-Asparagine	L-Aspartic acid	L-Lysine	Pyroglutamic acid	Ornithine	beta-Alanine	L-Threonine .1	D-Fructose	Sorbitol	Ribitol	Myoinositol	Inositol phosphate	Sedoheptulose 7-phosphate	L-Sorbose	D-Threitol	Threonic acid	Nonanoic acid	Capric acid	Myristic acid	Palmitoleic acid	Palmitic acid	Linoleic acid	Elaidic acid	Arachidic acid	Arachidonic Acid	Malonic acid	Unknown acid	Heptadecanoic acid	1-Monomyristin
13	FBS_medium1	1317469	3088819	285043	17664	375449	8265037	523280	924830	17339	2261965	7850385	906069	57134	562044	11452572	190341	142576	15173774	4782742	46764	2413601	6199824	4098511	4115635	3045653	933483	1036805	1149386	2376940	1189889	187810	1336574	1025185	12078504	294949	1657676	136640	11476736	11273178	19420262	63466	2736819	1178833	60016	37635	1656763	3242474	39360
14	FBS_medium2	1019498	3017299	257753	18332	329889	7817373	429276	924238	4645	2430799	7136138	934007	56835	570860	5205013	208728	171078	13862775	4952425	61456	2060188	6361170	3050032	3834317	3289002	961959	1075887	1338115	2189404	1213512	59025	1222617	1073077	11639582	296096	1390153	134140	13429621	1363918	19279147	22102	426434	450118	47767	27379	1609331	3014711	43755
15	FBS_medium3	1291973	2699236	274124	17550	274762	6565963	425533	799046	4605	2510136	6244602	1067901	62555	640111	7389235	142397	123240	13417090	4748695	61433	2155679	7488958	2739784	3937008	3047382	839810	1019674	1111855	1905505	1167091	170843	916451	988518	9627507	253080	1288500	105077	8403812	12011329	14550298	59834	9708395	989513	47664	30926	954933	2772395	67597
16	FBS_medium4	976371	2347681	211646	16845	250016	6576232	383594	705814	10903	1697665	4762812	813194	45837	487612	5040677	116908	109057	10178974	3662330	30174	1358053	4741190	2829012	2612424	2516186	662787	899752	997771	1797164	947365	443944	932134	894767	9691454	235620	1260133	121282	12126571	7240503	14110181	39777	11452431	876602	45499	28386	1130227	2587244	29741
17	FBS_medium5	848864	2030650	185994	14013	227156	5981629	336983	601348	20730	1425088	3651418	694844	37607	408197	3330486	91965	87913	8420041	3042296	19806	1328616	4049949	2523705	2363985	2159036	506629	806586	834345	1665377	809820	239029	793872	801256	8825000	203644	1083096	107413	5672874	5298755	11839948	35293	9195446	667381	38820	24063	1045975	2241932	22958
18	FBS_medium6	991597	2699392	206299	15259	325709	7287878	387743	751564	6661	1946560	5676548	1014745	66280	680069	7020628	160739	159091	11386185	4095524	38520	1794178	5313652	2827427	3126397	2787188	778260	1010598	1176451	1875192	1049649	246008	1005498	1003518	10807905	247253	1193804	95339	11371829	11758244	16805117	73376	1956837	1053364	45395	25254	714501	2632576	38107
31	FEx_medium1	437405	125600	61804	3379	233562	1916670	375871	730924	4585	1674198	5655477	763847	40896	465262	4861345	113702	94155	10299990	3512000	35020	1215537	4522325	2569618	2861808	2357735	685078	22985	83049	222141	53222	145029	819326	19410	348980	33297	1299966	64695	12111255	11737887	14412702	47448	1787111	660971	36616	17461	285931	2263744	37549
32	FEx_medium2	520088	112258	62402	3640	227258	2143333	392753	680997	2482	1775786	4726668	753157	38945	428913	2716218	85205	89321	9704164	3447561	38350	1331493	5096076	2711636	3100896	2408341	542538	24346	111271	217445	51345	158087	884988	26739	318088	31228	1611384	81852	10367987	10733148	14367973	35558	1806280	732474	30516	15939	646322	1984991	62776
33	FEx_medium3	792971	177406	66735	0	174400	2044883	457604	753546	5096	2129662	6465942	1141892	62460	672848	3472919	130736	107711	12760524	4665630	36841	866317	5767924	2979840	2659941	3204547	881543	28445	129959	426044	67990	97606	869945	24771	453651	39676	1274665	84584	5729335	3589851	9584260	13708	1045472	495895	45593	19440	957851	2675322	52797
34	FEx_medium4	499764	167855	72658	5811	310722	2245977	433138	884881	4142	2294518	7593474	1038615	61959	655780	2861109	186711	147585	13623274	4864133	61851	1303478	5815604	2637215	4250828	3320991	1003067	29056	139571	272887	69547	60808	834907	24692	606871	40120	1458593	98016	11072280	1446426	17315819	25863	307145	375593	42518	16228	1084929	2628377	14859
35	FEx_medium5	762971	167527	58629	2606	289281	2032695	394950	712342	2280	2077787	6517841	1030915	60986	678190	5237964	138609	108496	12405100	4516732	31636	868037	5517952	2774307	2801362	3130987	901877	30315	126741	220198	64794	260094	907966	27835	281259	40545	1054367	72585	7893616	10109506	14080069	35468	1645115	787723	51180	15461	548129	2533814	30508
36	FEx_medium6	1027338	245097	83732	4425	387478	2796631	551879	968386	3518	3161828	8804495	1577633	88075	1021369	3330378	205254	174816	18301663	6906218	63842	1558678	8699904	3835331	3994291	4951535	1373430	36034	193883	441964	108351	268525	1316494	34053	527952	57914	1626753	101007	11167595	12560775	18548979	56206	16569684	1043614	63967	23441	1306102	3647800	31068
[truncated: 37 more columns]
